# Supplementary material for: Esters of the Marine-Derived Triterpene Sipholenol A Reverse P-GP-Mediated Drug Resistance
Source: PubMed Central journal article supplement (PMC4413211; doi:10.3390/md13042267), 2015-04-14
Supplement: marinedrugs-13-02267-s001.pdf [file marinedrugs-13-02267-s001.pdf]

## Supplementary Information

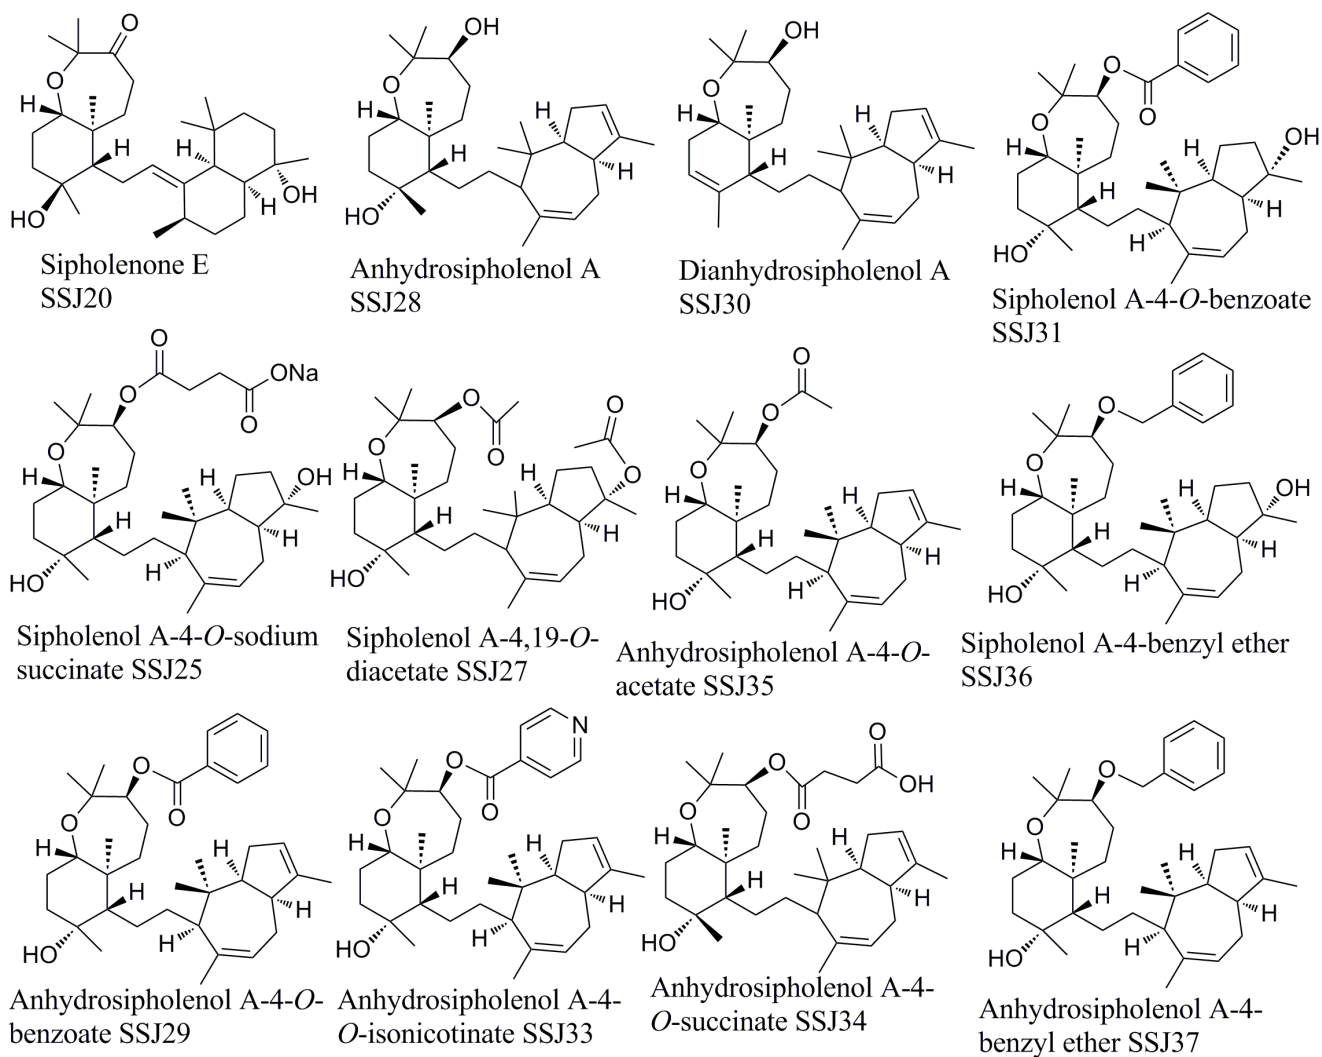

**Figure S1.** Structures of tested sipholane analogs.

**Table S1.** Cytotoxicity of 14 SSJ compounds against SW620 and P-gp over-expressing SW620/Ad300 cells <sup>a</sup>.

| Compounds  | IC <sub>50</sub> (μM) <sup>b</sup> |             |
|------------|------------------------------------|-------------|
|            | SW620                              | SW620/Ad300 |
| SSJ20 (1)  | >30.0                              | >30.0       |
| SSJ25 (2)  | >30.0                              | >30.0       |
| SSJ26 (3)  | >30.0                              | >30.0       |
| SSJ27 (4)  | >30.0                              | >30.0       |
| SSJ28 (5)  | >30.0                              | >30.0       |
| SSJ29 (6)  | >30.0                              | >30.0       |
| SSJ30 (7)  | >30.0                              | >30.0       |
| SSJ31 (8)  | >30.0                              | >30.0       |
| SSJ32 (9)  | >30.0                              | >30.0       |
| SSJ33 (10) | >30.0                              | >30.0       |
| SSJ34 (11) | >30.0                              | >30.0       |
| SSJ35 (12) | >30.0                              | >30.0       |
| SSJ36 (13) | >30.0                              | >30.0       |
| SSJ37 (14) | >30.0                              | >30.0       |

<sup>a</sup> Cell survival was determined by MTT assay as described in Section 2.3; <sup>b</sup> IC<sub>50</sub> values are represented from at least three independent experiments performed in triplicate.

© 2015 by the authors; licensee MDPI, Basel, Switzerland. This article is an open access article distributed under the terms and conditions of the Creative Commons Attribution license (<http://creativecommons.org/licenses/by/4.0/>).
